# Supplementary material
Source: PubMed Central journal article supplement (PMC5529253)
Supplement: NIHMS844627-supplement-Supp_Info.pdf [file NIHMS844627-supplement-Supp_Info.pdf]

**Table S1. Intervention Schedule and Components**

|                                          | <b>Low GL Treatment Group</b>                                                                                                                                                                                                                                                                                                                                                                                            | <b>Low Fat Treatment Group</b>                                                       |
|------------------------------------------|--------------------------------------------------------------------------------------------------------------------------------------------------------------------------------------------------------------------------------------------------------------------------------------------------------------------------------------------------------------------------------------------------------------------------|--------------------------------------------------------------------------------------|
| <b>1. Dietary composition</b>            | Low GL<br>40-45% C, 30-35% F, 20-25% P<br><i>Ad libitum</i> intake of low GI foods                                                                                                                                                                                                                                                                                                                                       | Low fat<br>50-55% C, 25-30% F, 20- 25%P<br><i>Ad libitum</i> intake of low fat foods |
| <b>2. Intervention schedule</b>          | <p style="text-align: center;">5 Weekly Telephone Sessions</p> <ol style="list-style-type: none"> <li>1. Diet introduction, Create a healthy home environment, Grocery shopping</li> <li>2. Dietary review, counseling, and support</li> <li>3. Portion size, Reading labels, Hunger and satiety, Meal planning</li> <li>4. Dietary review, counseling, and support</li> <li>5. Snacks, Beverages, Eating Out</li> </ol> |                                                                                      |
| <b>3. Behavioral approach</b>            | <p style="text-align: center;">Nutrition education (printed)<br/>Patient-centered counseling (registered dietitian)</p>                                                                                                                                                                                                                                                                                                  |                                                                                      |
| <b>4. Printed educational curriculum</b> | <p style="text-align: center;">New materials for Sessions 1, 3 and 5:<br/>Session Education Sheet<br/>Food Choice Lists<br/>Menu/Snack Ideas<br/>Shopping List<br/>Games for kids</p>                                                                                                                                                                                                                                    |                                                                                      |

**Table S2. Parent Experience\***

|                                                        | Low GL<br>(n=11) | Low Fat<br>(n=9) | P†   |
|--------------------------------------------------------|------------------|------------------|------|
| Scheduling of the telephone counseling sessions        | 9.4 ± 1.0        | 9.9 ± 0.3        | 0.14 |
| What was discussed with the dietitian on the telephone | 9.9 ± 0.3        | 9.9 ± 0.3        | 0.89 |
| Printed nutritional education materials for parents    | 9.4 ± 0.8        | 9.7 ± 0.5        | 0.34 |
| Printed nutritional education materials for children   | 9.0 ± 0.9        | 9.4 ± 1.0        | 0.31 |
| Overall satisfaction                                   | 9.4 ± 0.7        | 10.0 ± 0         | 0.01 |
| Child's interest in the study§                         | 3.0 ± 1.3        | 2.8 ± 0.4        | 0.63 |

Mean ± standard deviation \*Scale of 1 to 10 where 1 is not at all satisfied and 10 is extremely satisfied

† P-value for comparison between groups

§ As reported by the parent. Scale of 0 to 4 where 0 is not at all and 4 is extremely
